# Supplementary material for: Complex Positive Effects of SGLT-2 Inhibitor Empagliflozin in the Liver, Kidney and Adipose Tissue of Hereditary Hypertriglyceridemic Rats: Possible Contribution of Attenuation of Cell Senescence and Oxidative Stress
Source: MDPI journal article supplement (doi:10.3390/ijms221910606), 2021-09-30
Supplement: s1 [file s1]

## Supplementary Materials

### Supporting Text

#### **Text S1. Sample preparation for NMR-based metabolomics**

145  $\mu$ l plasma samples were mixed with 290  $\mu$ l cold methanol, vortexed, and incubated at -20 °C for 30 min. The mixture was centrifuged at 14,000 rpm for 30 min at 4 °C; 360  $\mu$ l supernatant were vacuum-dried. Dry matter was mixed with 162  $\mu$ l D<sub>2</sub>O and 18  $\mu$ l phosphate buffer (1.5 M, pH = 7.4, in D<sub>2</sub>O, containing 0.58 mM TSP) and transferred to 3 mm NMR tubes. Approximate 90 mg liver tissue was vortexed with 540  $\mu$ l formate buffer (0.4 M, pH = 2.75), than cold methanol in a ratio 1:4 (v/v) was added and the sample was left at -80 °C overnight. The mixture was centrifuged at 9,000 rpm for 30 min at 4 °C; 1250  $\mu$ l supernatant were vacuum-dried. Dry extract was mixed with 450  $\mu$ l D<sub>2</sub>O and 50  $\mu$ l phosphate buffer (1.5 M, pH = 7.4, in D<sub>2</sub>O, containing 0.58 mM TSP) and transferred to 5 mm NMR tubes.

#### **Text S2. NMR experiments**

The NMR spectra were recorded at 298 K on a 600 MHz Bruker Avance III spectrometer (Bruker BioSpin, Rheinstetten, Germany) equipped with a 5-mm TCI cryogenic probe head. Tuning, matching, shimming and adjusting of the 90° pulse length were carried out for each sample in automatic regime.

The proton spectra were acquired by a Carr-Purcell-Meiboom-Gill (CPMG) pulse program (cpmgpr1d) with presaturation during relaxation delay (4 s) using a 25-Hz saturation pulse centered on the water resonance; number of scans (NS) = 128; number of data points (TD) = 64 k; spectral width (SW) = 20 ppm; echo time = 0.3 ms; loop for T2 filter = 126. Additionally, a short J-resolved experiment with presaturation (jresgpprqf, NS = 4, SW = 16 ppm, TD = 8 k, number of increments = 40, SW = 78.125 Hz in the indirect dimension, and relaxation delay = 2 s) was recorded for each sample to partially solve the problem with the signal overlap.

## Supporting figures

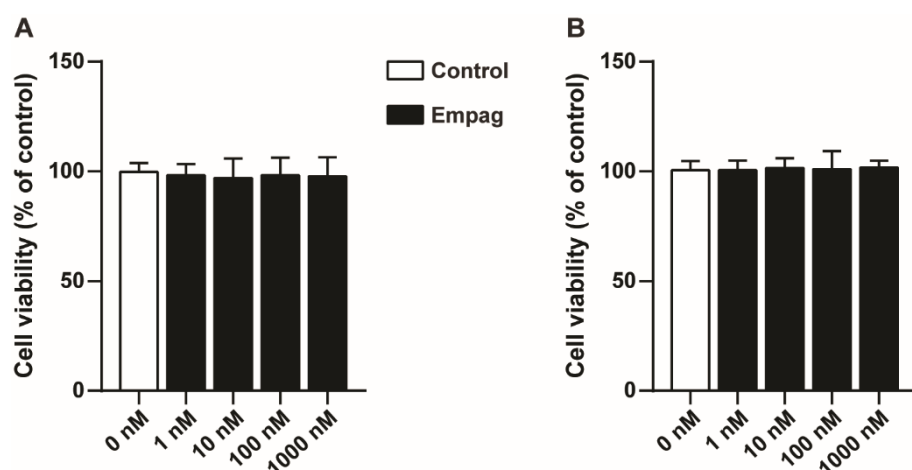

**Figure S1.** Effect of empagliflozin on the viability of HepG2 and 3T3-L1 cell lines. **(A)** HepG2 cells were cultivated in MEM with 5 mM glucose and empagliflozin (0 – 1000 nM) for 24 h. **(B)** 3T3-L1 cells were cultivated in DMEM with 25 mM glucose and empagliflozin (0 – 1000 nM) for 24 h. Determination of cell viability was assessed by WST-1 kit. The results are derived from at least three independent experiments run in triplicates. Data are expressed as mean  $\pm$  SD.

**A**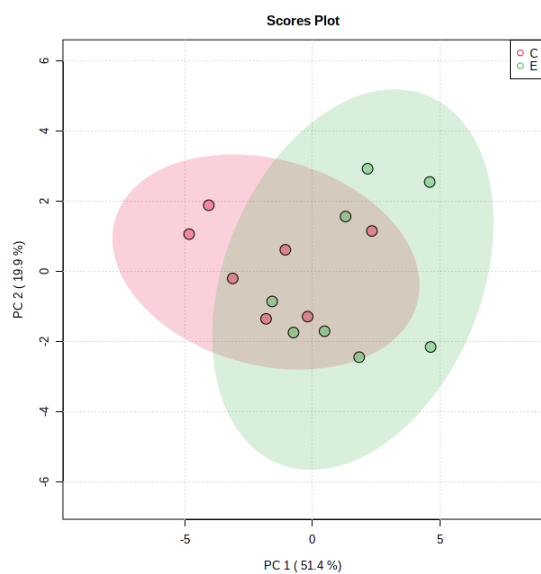**B**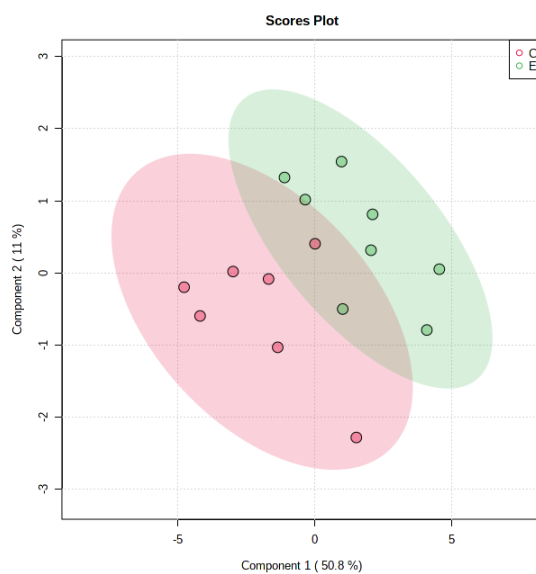

Scores plots for the first two components of PCA model (**A**) and PLS-DA model (**B**) built from spectra of plasma samples. The results of leave-one-out validation for PLS-DA model with four components: accuracy = 0.87,  $R^2$  = 0.91,  $Q^2$  = 0.51. Symbols: (●) Control group; (●) Empagliflozin treated group.

**A**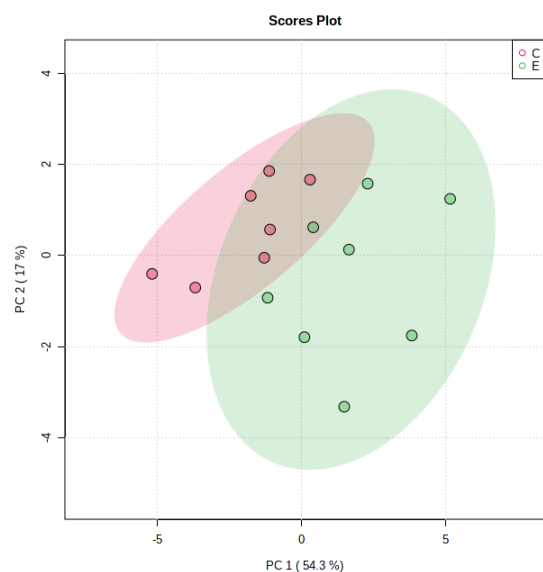**B**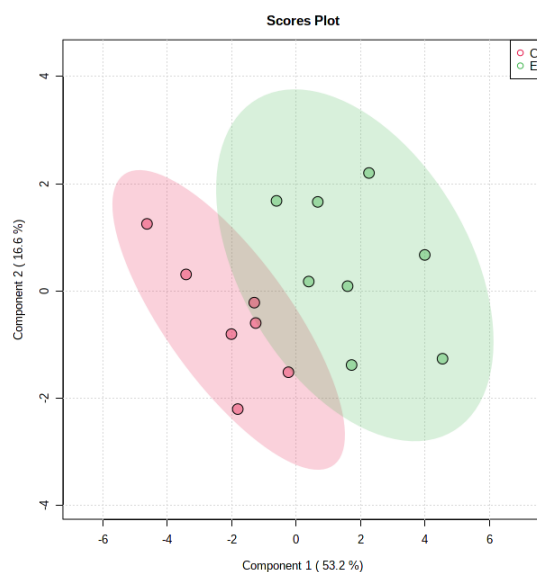

**Figure S3.** Scores plots for the first two components of PCA model (**A**) and PLS-DA model (**B**) built from spectra of polar liver extracts. The results of leave-one-out validation for PLS-DA model with three components: accuracy = 0.80,  $R^2 = 0.89$ ,  $Q^2 = 0.41$ .

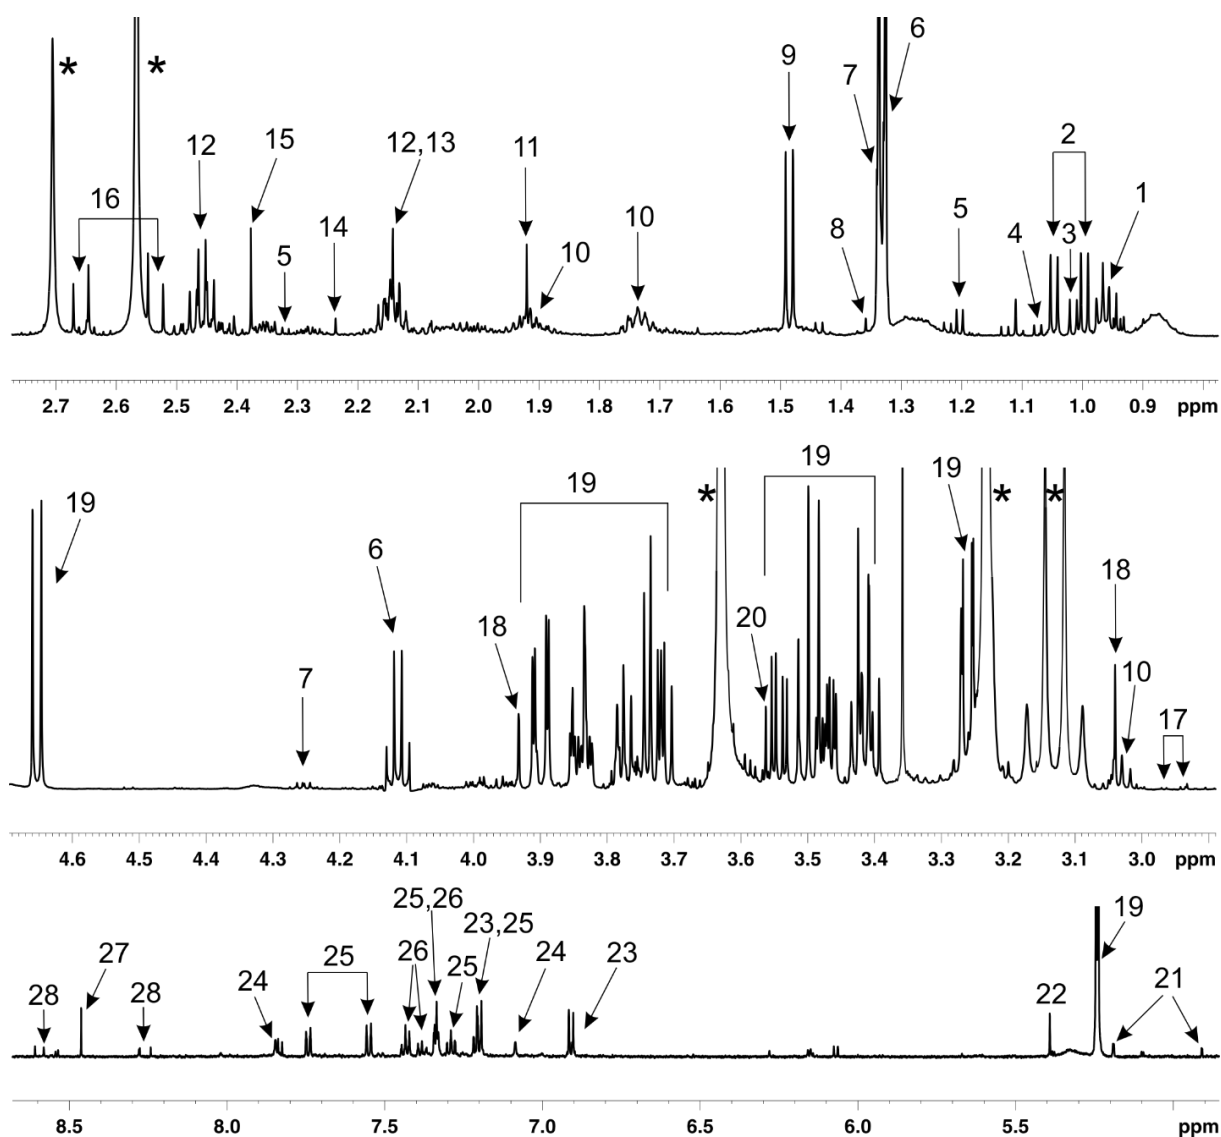

**Figure S4.** Representative <sup>1</sup>H NMR spectrum of plasma of hHTG rat. 1: leucine; 2: valine; 3: isoleucine; 4: isobutyrate; 5: β-hydroxybutyrate; 6: lactate; 7: threonine; 8: α-hydroxyisobutyrate; 9: alanine; 10: lysine; 11: acetate; 12: glutamine; 13: methionine; 14: acetone; 15: pyruvate; 16: citrate; 17: asparagine; 18: creatine; 19: glucose; 20: glycine; 21: mannose; 22: allantoin; 23: tyrosine; 24: histamine; 25: tryptophan; 26: phenylalanine; 27: formate; 28: ATP/ADP/AMP; \*: EDTA.

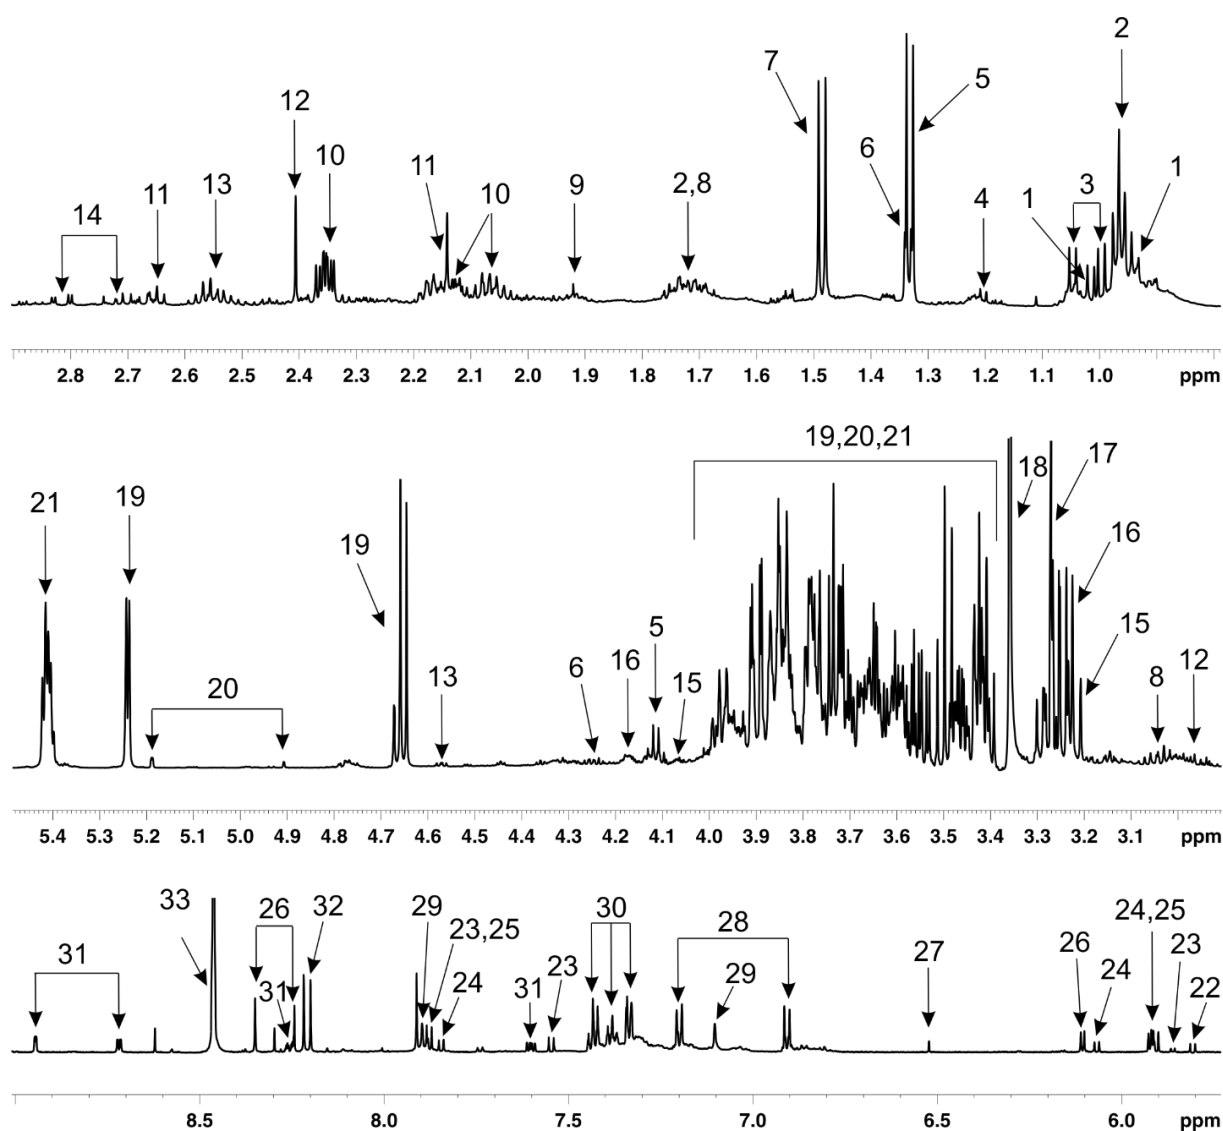

**Figure S5.** Representative <sup>1</sup>H NMR spectrum of polar liver extract of hHTG rat. 1: isoleucine; 2: leucine; 3: valine; 4: β-hydroxybutyrate; 5: lactate; 6: threonine; 7: alanine; 8: lysine; 9: acetate; 10: glutamate; 11: methionine; 12: succinate; 13: glutathione; 14: aspartate; 15: choline; 16: o-phosphocholine; 17: betaine; 18: methanol; 19: glucose; 20: mannose; 21: glycogen; 22: uracil; 23: xanthosine; 24: cytidine; 25: uridine; 26: inosine; 27: fumarate; 28: tyrosine; 29: histamine; 30: phenylalanine; 31: niacinamide; 32: hypoxanthine; 33: formate.

## Supporting Tables

**Table S1. Primer references of assessed genes for TaqMan® Gene Expression Assays.**

| Gene                 | Assay ID      | Protein                                                              |
|----------------------|---------------|----------------------------------------------------------------------|
| Acaca                | Rn00573474_m1 | Acetyl-CoA carboxylase alpha                                         |
| Agl                  | Rn01521753_m1 | Amylo-alpha-1, 6-glucosidase, 4-alpha-glucanotransferase             |
| Atgl                 | Rn01479969_m1 | Patatin-like phospholipase domain containing 2, adipose triglyceride |
| Ccr2                 | Rn01637698_s1 | Chemokine (C-C motif) receptor 2                                     |
| Cd14                 | Rn00572656_g1 | Cd14 molecule; monocyte differentiation antigen CD14                 |
| Cd36                 | Rn00580728_m1 | Cd36 molecule; fatty acid translocase                                |
| Cd68                 | Rn01495634_g1 | Cd68 molecule                                                        |
| Cidea                | Rn04181355_m1 | Cell death-inducing DFFA-like effector a                             |
| Cpt1a                | Rn00580702_m1 | Carnitine palmitoyl transferase 1A                                   |
| Cpt1b                | Rn00682395_m1 | Carnitine palmitoyl transferase 1B                                   |
| Dio2                 | Rn00581867_m1 | Iodothyronine deiodinase 2                                           |
| Fasn                 | Rn00569117_m1 | Fatty acid synthase                                                  |
| Foxo1                | Rn01494868_m1 | Forkhead box O1                                                      |
| G6pc                 | Rn00689876_m1 | Glucose-6-phosphatase                                                |
| Gpam                 | Rn00568620_m1 | Glycerol-3-phosphate acyltransferase, mitochondrial                  |
| Hmox1                | Rn00561387_m1 | Heme oxygenase 1                                                     |
| Hsl                  | Rn00689222_m1 | Lipase E, hormone sensitive type                                     |
| Ikk2                 | Rn00584379_m1 | Inhibitor of nuclear factor kappa B kinase subunit beta              |
| Il10                 | Rn01483988_g1 | Interleukin 10                                                       |
| Il6                  | Rn01410330_m1 | Interleukin 6                                                        |
| Insr                 | Rn00690703_m1 | Insulin receptor                                                     |
| Kim-1                | Rn00597703_m1 | Havcr-1; Hepatitis A virus cellular receptor 1                       |
| Lpl                  | Rn00561482_m1 | Lipoprotein lipase                                                   |
| Mcp-1                | Rn00580555_m1 | Chemokine (C-C motif) ligand 2                                       |
| Ngal                 | Rn00590612_m1 | Lipocalin 2                                                          |
| Nrf2                 | Rn00582415_m1 | Nuclear factor, erythroid 2-like 2                                   |
| p16 <sup>Ink4a</sup> | RN00580664_m1 | Cyclin-dependent kinase inhibitor 2A                                 |
| p21 <sup>waf1</sup>  | RN00589996_m1 | Cyclin-dependent kinase inhibitor 1A                                 |
| Pck1                 | Rn01529014_m1 | Phosphoenolpyruvate carboxykinase 1                                  |
| Pgc-1 $\alpha$       | Rn00580241_m1 | PPAR $\gamma$ coactivator 1 alpha                                    |
| Pgc-1 $\beta$        | Rn00598552_m1 | PPAR $\gamma$ coactivator 1 beta                                     |
| Ppar $\gamma$        | Rn00440945_m1 | PPAR $\gamma$ ; peroxisome proliferator-activated receptor gamma     |
| Ppp1ca               | Rn00580546_m1 | PP1alpha; protein phosphatase 1 catalytic subunit alpha              |
| Ppp2ca               | Rn01460084_g1 | PP2A-alpha; protein phosphatase 2 catalytic subunit alpha            |
| Prkaa1               | Rn00665045_m1 | Protein kinase AMP-activated catalytic subunit alpha 1               |
| Prkab2               | Rn00575219_m1 | Protein kinase AMP-activated non-catalytic subunit beta 2            |
| Prkag3               | Rn01400849_m1 | Protein kinase AMP-activated non-catalytic subunit gamma 3           |
| Ptpn1                | Rn01423685_m1 | Protein tyrosine phosphatase, non-receptor type 1                    |
| Rela                 | Rn01502266_m1 | Nuclear factor NF-kappa-B p65 subunit                                |
| Sirt1                | Rn01428096_m1 | Sirtuin 1                                                            |
| Sgt1                 | Rn01640634_m1 | Solute carrier family 5 member 1                                     |
| Sgt2                 | Rn00574917_m1 | Solute carrier family 5 member 2                                     |
| Socs3                | Rn00585674_s1 | Suppressor of cytokine signalling 3                                  |
| Tgf $\beta$ 1        | Rn00572010_m1 | TGF- $\beta$ ; transforming growth factor, beta 1                    |
| Timp2                | Rn00573232_m1 | TIMP metalloproteinase inhibitor 2                                   |
| Tnf                  | Rn99999017_m1 | TNF- $\alpha$ ; tumor necrosis factor                                |

**Table S2. Primer references of control gene for TaqMan® Gene Expression Assays.**

| Gene  | Assay ID      | Protein                                  |
|-------|---------------|------------------------------------------|
| 18s   | Hs99999901_s1 | Eukaryotic 18S rRNA                      |
| B2m   | Rn00560865_m1 | Beta-2-microglobulin                     |
| Gapdh | Rn01775763_g1 | Glyceraldehyde-3-phosphate dehydrogenase |
| Gusb  | Rn00566655_m1 | Glucuronidase, beta                      |

**Table S3. Primer sequences for mRNA quantification in cell lines.**

| Gene                | GenBank     | Species      | Forward (5'-3')         | Reverse (5'-3')          |
|---------------------|-------------|--------------|-------------------------|--------------------------|
| p21 <sup>Waf1</sup> | NM_007669.5 | Mus musculus | TCGCTGTCTTGCACTCTGGTGT  | GTGGGCACTTCAGGGTTTTCTC   |
| p21 <sup>WAF1</sup> | NM_000389.5 | Homo sapiens | TCACTGTCTTGTACCCTTGTGC  | GGCGTTTGGAGTGGTAGAAA     |
| B2m                 | NM_009735.3 | Mus musculus | GCCTGTATGCTATCCAGAAAACC | CGGGTGGAAGTGTGTTACG      |
| B2M                 | NM_004048.4 | Homo sapiens | GGCTATCCAGCGTACTCCAAAG  | CTTCAATGTCGGATGGATGAAACC |
